# Supplementary material
Source: publisher figshare collection journal article supplement (https://sage.figshare.com/ndownloader/files/35101203)
Supplement: Supplementary file 1 [file 35101203]

#### Appendix 4. Direct and Indirect paths

| Variables                                                                                                                                              | Direct effect     | Indirect effect  |
|--------------------------------------------------------------------------------------------------------------------------------------------------------|-------------------|------------------|
| Risk Perception → Task                                                                                                                                 | 0.55***<br>(0.04) |                  |
| Risk Perception → Contextual                                                                                                                           | 0.51**<br>(0.04)  |                  |
| Risk Perception → Safety Behavior                                                                                                                      | 0.12*<br>(0.01)   |                  |
| Safety Behavior → Task                                                                                                                                 | 0.02*<br>(0.04)   |                  |
| Safety Behavior → Contextual                                                                                                                           | 0.01*<br>(0.05)   |                  |
| Risk perception → Safety Behavior → Task                                                                                                               |                   | 0.49**<br>(0.04) |
| Risk perception → Safety Behavior → Contextual                                                                                                         |                   | 0.46*<br>(0.04)  |
| ***p < 0.001, **p < 0.01, *p < 0.05. *** denotes significant level of 0.001; ** denotes significant level of 0.01; * denotes significant level of 0.05 |                   |                  |
